# Supplementary material for: Anti-citrullinated protein antibodies contribute to platelet activation in rheumatoid arthritis
Source: PubMed Central journal article supplement (PMC4548712; doi:10.1186/s13075-015-0665-7), 2015-08-24
Supplement: 13075_2015_665_MOESM2_ESM.pdf [file 13075_2015_665_MOESM2_ESM.pdf]

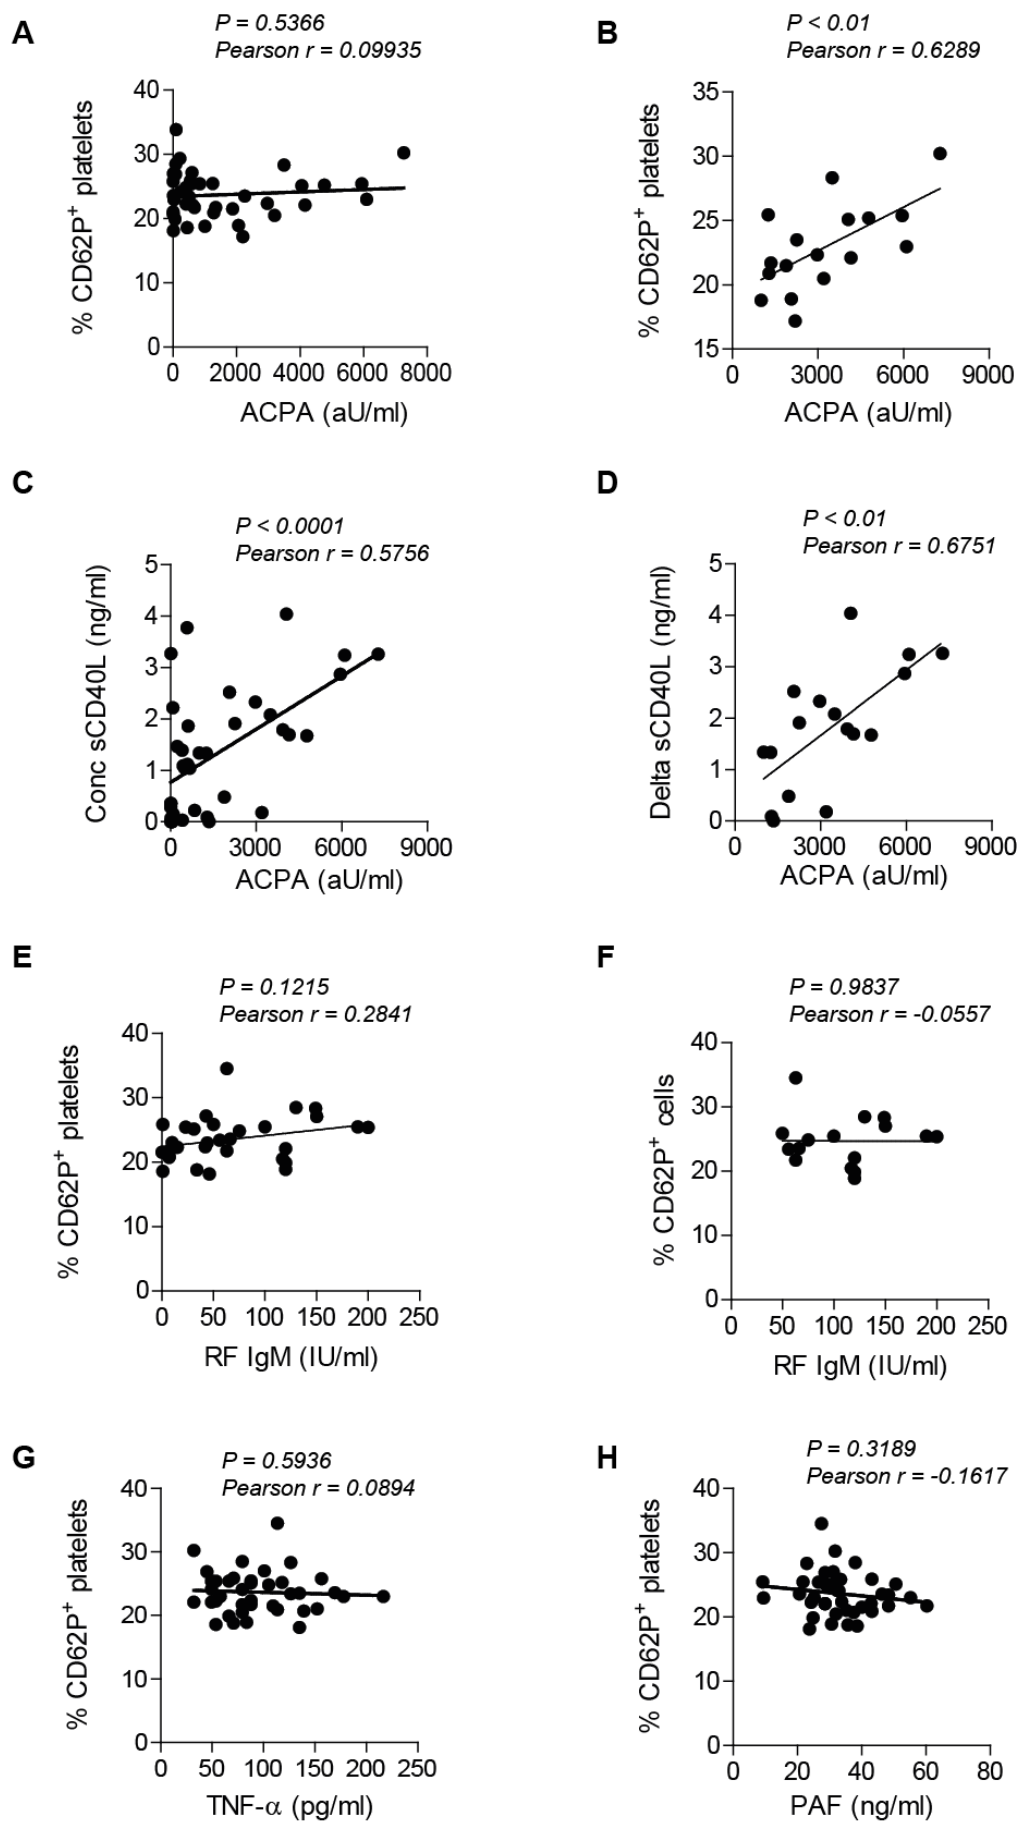

Online Figure 2
